# Supplementary material for: Epidemiologie und Prävention hitzebedingter Gesundheitsschäden älterer Menschen
Source: Springer Nature journal article supplement (doi:10.1007/s00391-019-01594-4), 2019-07-25
Supplement: MOESM1 [file 16990566]

Tabelle: Arzneistoffe mit potenziellem Einfluss auf die Temperaturregulation und den Volumenstatus in Hitzewellen

| Stoffklasse                                                                                                                                                                   | Erwartetes/vermutetes Risiko                                               | Mögliche Maßnahmen zur Risikominimierung                                                   |
|-------------------------------------------------------------------------------------------------------------------------------------------------------------------------------|----------------------------------------------------------------------------|--------------------------------------------------------------------------------------------|
| Diuretika                                                                                                                                                                     | Verstärkung der Hypovolämieneigung                                         | Gewichtsmonitoring, ausreichende Flüssigkeits- und ggf. Elektrolytzufuhr                   |
| Histamin-H <sub>1</sub> -Antagonisten der ersten Generation (z.B. Chlorpheniramin, Clemastin, Cryptoheptadin, Dimetinden, Diphenhydramin, Doxylamin, Hydroxycin, Promethazin) | Anticholinerge Hemmung der Schweißproduktion                               | Wechsel auf H <sub>1</sub> -Antagonisten höherer Generationen erwägen                      |
| Insulin (rasch freisetzend)                                                                                                                                                   | Rascheres Anfluten                                                         | Intensiviertes Blutzuckermonitoring, ggf. Dosisanpassung                                   |
| Neuroleptika (insbesondere Phenothiazine)                                                                                                                                     | Anticholinerge Hemmung der Schweißproduktion, malignes Neuroleptikasyndrom | Enges UAW-Monitoring und ggf. Dosisanpassung                                               |
| Opioide als transdermale therapeutische Systeme (Pflaster)                                                                                                                    | Rascheres und verstärktes Anfluten                                         | UAW-Monitoring und ggf. Dosisanpassung                                                     |
| Parasympatholytika (Atropin, Scopolamin)                                                                                                                                      | Anticholinerge Hemmung der Schweißproduktion                               | Möglichst vermeiden                                                                        |
| (überwiegend) renal eliminierte Arzneimittel (Q <sub>0</sub> -Wert < 0.3)                                                                                                     | Akkumulation, verstärkte Wirkung, ggf. UAW und Toxizität                   | Dosisanpassung                                                                             |
| Sympathomimetika                                                                                                                                                              | Kutane Vasokonstriktion                                                    | Möglichst vermeiden                                                                        |
| Trizyklika (Amitriptylin, Desipramin, Doxepin)                                                                                                                                | Anticholinerge Hemmung der Schweißproduktion                               | Möglichst vermeiden, Therapiewechsel auf weniger anticholinerge Vertreter erwägen          |
| Urologische anticholinerge Spasmolytika (z.B. Oxybutynin, Solifenacin, Tolterodin)                                                                                            | Anticholinerge Hemmung der Schweißproduktion                               | Therapiewechsel auf weniger anticholinerge Vertreter erwägen                               |
| Zentrale α <sub>2</sub> -Agonisten (z.B. Clonidin)                                                                                                                            | Erhöhung der Schweißsekretionsschwelle                                     | Möglichst vermeiden, aber nicht akut absetzen, sondern ausschleichen (cave Entzugssyndrom) |

Q<sub>0</sub>-Wert: Extrarenal eliminierte, bioverfügbare Dosisfraktion (s. z.B. [www.dosing.de](http://www.dosing.de)); UAW: Unerwünschte Arzneimittelwirkung
